# Supplementary material for: Iron chelation and 2‐oxoglutarate‐dependent dioxygenase inhibition suppress mantle cell lymphoma's cyclin D1
Source: PubMed Central journal article supplement (PMC6815829; doi:10.1111/jcmm.14655), 2019-09-13
Supplement: JCMM-23-7785-s002.pdf [file JCMM-23-7785-s002.pdf]

## Supplementary Materials and Methods

### *Cell culture*

F1 hybrid 129SvJae×C57BL/6 mouse ESC (mESC) line V6.5 (Open Biosystems) was maintained on culture dishes covered with 0.1% gelatin (Sigma-Aldrich) in a humidified atmosphere of 10% CO<sub>2</sub> at 37°C in high-glucose Dulbecco's modified Eagle's medium (DMEM) with GlutaMAX (Gibco) supplemented with 15% fetal bovine serum (FBS; Hyclone), 0.1 mM non-essential amino acids, 1 mM sodium pyruvate, 2 mM glutamine, 100 U/mL penicillin, 100 µg/mL streptomycin (Gibco), 0.1 µM β-mercaptoethanol (Serva) and 1000 U/mL leukemia inhibitory factor (ESGRO, Chemicon). The total *in vitro* culture time of these mESCs at the time of experimental testing was equivalent to passage number 22-40 of the original mESC line. 10 µM deferoxamine mesylate (DFO, Sigma-Aldrich) was used when appropriate. The cells were checked repeatedly for chromosome number and possible karyotypic abnormalities. The rescue experiment was performed using mixture of deoxynucleosides namely 2'-deoxyadenosine, 2'-deoxyguanosine, 2'-deoxycytidine, 2'-deoxythymidine (purchased individually from Sigma-Aldrich), concentration was 50 µM each. Deoxynucleosides were added at the same time as DFO when appropriate or used separately.

### *Determination of RR activity*

Exponentially growing cells ( $5 \times 10^5$ ) were treated with 10 µM DFO or left untreated. Then, cells were pulsed with <sup>14</sup>C-cytidine (100 µCi/mL, Moravék Biochemical, CA) at 37°C for 30 min, collected, washed twice with PBS and processed to extract total genomic DNA. Thereafter, high-efficiency liquid-scintillation counting of <sup>14</sup>C-labelled DNA was used. <sup>14</sup>C-cytidine was quantified simultaneously using an LS6500 liquid scintillation counter (Beckman Coulter).

### *Determination of intracellular nucleotides*

To identify intracellular nucleotides, DFO-treated cells and untreated cells ( $5 \times 10^6$  cells of each) were extracted in 100 µl of ice-cold 0.1 M TCA. Samples were left on ice (10 min) for deproteination; then, after centrifugation (3 min, 12 100×g), the supernatant was collected and back-extracted with diethyl ether (3×1 mL). The water phase was analyzed by capillary

electrophoresis on an Agilent 3D CE instrument (Agilent Technologies, Waldbronn, Germany) as described in Friedecky et al., 2007.

#### *Flow cytometric analysis*

Cells were collected in time points as indicated, washed in PBS+1% FBS, fixed with 70% ethanol, and stained with 60 µg/µl propidium iodide (Sigma-Aldrich) in 1.1% sodium citrate dehydrate with 5 ng/µl ribonuclease A (DNA Lego Ribonuclease A; Top-Bio, Czech Republic) for 30 min at 37°C in the dark, and analyzed by flow cytometry. For γH2AX analysis, the cells were fixed in 70% ethanol, and stained with anti Phospho-Histone H2A.X (Ser139) (20E3) Rabbit mAb (Alexa Fluor® 488 Conjugate, 1:50. Cell Signaling Technology) for 45 min at 37°C in the dark and analyzed by flow cytometry. All flow cytometry analyses were performed on the Cytomics FC 500 machine using a CXP software (Beckman Coulter) by standard procedure.

#### *Statistical analysis*

Presented data were described as absolute numbers and percent prevalence; continuous variables are presented as average ± standard deviation. Student's t-test was used to compare continuous variables. A p-value of less than 0.05 was considered statistically significant.

#### **Reference**

Friedecký D, Tomková J, Maier V, *et al.* Capillary electrophoretic method for nucleotide analysis in cells: Application on inherited metabolic disorders. *Electrophoresis*. 2007; 28: 373-380.
